# Supplementary material for: Can Anonymous Posters on Medical Forums be Reidentified?
Source: J Med Internet Res. 2013 Oct 3;15(10):e215. doi: 10.2196/jmir.2514 (PMC3806358; doi:10.2196/jmir.2514)
Supplement: Supplementary file 1 [file jmir_v15i10e215_app1.pdf]

## Multimedia Appendix 1

### *Context Probability Interpolation*

An example of the general method of context probability interpolation is the probability of character “l” in the context of the word medical calculated as a sum of conditional probabilities of this character in dependence of different context length up to the limited maximal length, in this particular case equal to 5:

$$P_{\text{blended}}('l') = \lambda_5 \cdot P('l' \mid \text{"edica"}) + \lambda_4 \cdot P('l' \mid \text{"dica"}) + \lambda_3 \cdot P('l' \mid \text{"ica"}) + \lambda_2 \cdot P('l' \mid \text{"ca"}) + \lambda_1 \cdot P('l' \mid \text{"a"}) + \lambda_0 \cdot P('l')$$

where  $\lambda_i$  ( $i = 1 \dots 5$ ) are normalization coefficients; some of them can be equal to zero and

$$\sum_{i=1}^5 \lambda_i = 1, \text{ where } 5 \text{ is the maximal length of the context.}$$
